# Supplementary material for: Analysis of animal-to-human translation shows that only 5% of animal-tested therapeutic interventions obtain regulatory approval for human applications
Source: PubMed Central journal article supplement (PMC11175415; doi:10.1371/journal.pbio.3002667), 2024-06-13
Supplement: pbio.3002667.s001.pdf [file pbio.3002667.s001.pdf]

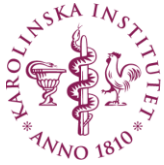

## Documentation of search strategies University Library search consultation group

---

Date: August 1 2023

Topic/research question: Bench-to-bedside translation in animal research

Name of researcher(s): Benjamin Ineichen

Librarian(s): Emma-Lotta Säätelä

---

Databases:

1. Medline (Ovid)
  2. Embase (embase.com)
  3. Web of Science Core Collection (Clarivate)
- 

Total number of hits

Broader search (incl narrower):

- Before deduplication: 51,541
- After deduplication: 33,169

Narrower search only:

- Before deduplication: 5,115
  - After deduplication: 3,230
- 

Comments:

Deduplication based on the method described in:

Bramer, W. M., Giustini, D., de Jonge, G. B., Holland, L., & Bekhuis, T. (2016). De-duplication of database search results for systematic reviews in EndNote. *Journal of the Medical Library Association: JMLA*, 104(3), 240–243. doi:10.3163/1536-5050.104.3.014

One final, extra step was added to compare DOIs.

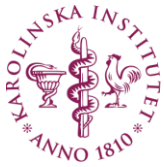

## 1. Medline

Interface: Ovid MEDLINE(R) and Epub Ahead of Print, In-Process & Other Non-Indexed Citations and Daily

Date of Search: 17 June 2022

Number of hits:

- Broad: 19078
- Narrow: 1795

Comment: In Ovid, two or more words are automatically searched as phrases; i.e. no quotation marks are needed

Field labels

- exp/ = exploded MeSH term
- / = non exploded MeSH term
- .ti,ab,kf. = title, abstract and author keywords
- adjx = within x words, regardless of order
- \* = truncation of word for alternate endings

Database(s): **Ovid MEDLINE(R) and Epub Ahead of Print, In-Process, In-Data-Review & Other Non-Indexed Citations and Daily** 1946 to June 16, 2022

Search Strategy:

| # | Searches                                                                                                                                                                                                                                                                                                                                                                                                                                                                                                                                                                                                                                                                                                                                                                                                                                                                                                                                                                                                                                                                                                                                                                                                                                            | Results |
|---|-----------------------------------------------------------------------------------------------------------------------------------------------------------------------------------------------------------------------------------------------------------------------------------------------------------------------------------------------------------------------------------------------------------------------------------------------------------------------------------------------------------------------------------------------------------------------------------------------------------------------------------------------------------------------------------------------------------------------------------------------------------------------------------------------------------------------------------------------------------------------------------------------------------------------------------------------------------------------------------------------------------------------------------------------------------------------------------------------------------------------------------------------------------------------------------------------------------------------------------------------------|---------|
| 1 | exp Animal Experimentation/ or exp Models, animal/ or exp Invertebrates/ or Animals/ or exp Animal Population Groups/ or Chordata/ or exp Chordata, nonvertebrate/ or Vertebrates/ or exp Amphibians/ or exp Birds/ or exp Fishes/ or exp Reptiles/ or Mammals/ or Primates/ or exp Artiodactyla/ or exp Carnivora/ or exp Cetacea/ or exp Chiroptera/ or exp Elephants/ or exp Hyraxes/ or exp Insectivora/ or exp Lagomorpha/ or exp Marsupialia/ or exp Monotremata/ or exp Perissodactyla/ or exp Rodentia/ or exp Scandentia/ or exp Sirenia/ or exp Xenarthra/ or Haplorhini/ or exp Strepsirhini/ or exp Platyrrhini/ or exp Tarsii/ or Catarrhini/ or exp Cercopithecidae/ or exp Hylobatidae/ or Hominidae/ or exp Gorilla Gorilla/ or exp Pan Paniscus/ or exp Pan Troglodytes/ or exp Pongo pygmaeus/                                                                                                                                                                                                                                                                                                                                                                                                                                    | 7181215 |
| 2 | (animals or animal or mice or mus or mouse or murine or woodmouse or rats or rat or murinae or muridae or cottonrat or cottonrats or hamster or hamsters or cricetinae or rodentia or rodent or rodents or pigs or pig or swine or swines or piglets or piglet or boar or boars or sus scrofa or ferrets or ferret or polecat or polecats or mustela putorius or guinea pigs or guinea pig or cavia or callithrix or marmoset or marmosets or cebuella or hapale or octodon or chinchilla or chinchillas or gerbillinae or gerbil or gerbils or jird or jirds or merione or meriones or rabbits or rabbit or hares or hare or diptera or flies or fly or dipteral or drosophila or drosophilidae or cats or cat or carus or felis or nematoda or nematode or nematodes or sipunculida or dogs or dog or canine or canines or canis or sheep or sheeps or mouflon or mouflons or ovis or goats or goat or capra or capras or rupicapra or rupicapras or chamois or haplorhini or monkey or monkeys or anthropoidea or anthropoids or saguinus or tamarin or tamarins or leontopithecus or hominidae or ape or apes or panpaniscus or bonobo or bonobos or pan troglodytes or gibbon or gibbons or siamang or siamangs or nomascus or symphalangus or | 5469654 |



|    |                                                                                                                                                                                                                                                                                                                                                                                                                                                                                                                                                                                                                                                                                                                                                                                                                                                                                                                                                                                                                                                                                                                                                                                                                                                                                                                                                                                                                                                                                                                                                                                                                                                                                                                                                                                                                                                                                                                                                                                                                                                                                                                                                                                                                                                                                                                                                                                                                                                                 |         |
|----|-----------------------------------------------------------------------------------------------------------------------------------------------------------------------------------------------------------------------------------------------------------------------------------------------------------------------------------------------------------------------------------------------------------------------------------------------------------------------------------------------------------------------------------------------------------------------------------------------------------------------------------------------------------------------------------------------------------------------------------------------------------------------------------------------------------------------------------------------------------------------------------------------------------------------------------------------------------------------------------------------------------------------------------------------------------------------------------------------------------------------------------------------------------------------------------------------------------------------------------------------------------------------------------------------------------------------------------------------------------------------------------------------------------------------------------------------------------------------------------------------------------------------------------------------------------------------------------------------------------------------------------------------------------------------------------------------------------------------------------------------------------------------------------------------------------------------------------------------------------------------------------------------------------------------------------------------------------------------------------------------------------------------------------------------------------------------------------------------------------------------------------------------------------------------------------------------------------------------------------------------------------------------------------------------------------------------------------------------------------------------------------------------------------------------------------------------------------------|---------|
|    | chimpanzee or chimpanzees or prosimian or prosimians or bush baby or bush babies or galagos or galago or pongidae or gorilla or gorillas or pongo pygmaeus or orangutan or orangutans or lemur or lemurs or lemuridae or horse or horses or equus or cow or calf or bull or chicken or chickens or gallus or quail or bird or birds or quails or poultry or poultries or fowl or fowls or reptile or reptilia or reptiles or snakes or snake or lizard or lizards or alligator or alligators or crocodile or crocodiles or turtle or turtles or amphibian or amphibians or amphibia or frog or frogs or bombina or salientia or toad or toads or epidalea calamita or salamander or salamanders or eel or eels or fish or fishes or pisces or catfish or catfishes or siluriformes or arius or heteropneustes or sheatfish or perch or perches or percidae or perca or trout or trouts or char or chars or salvelinus or minnow or cyprinidae or carps or carp or zebrafish or zebrafishes or goldfish or goldfishes or guppy or guppies or chub or chubs or tinca or barbels or barbuis or pimephales or promelas or poecilia reticulata or mullet or mullets or eel or eels or seahorse or seahorses or mugil curema or atlantic cod or shark or sharks or catshark or anguilla or salmonid or salmonids or whitefish or whitefishes or salmon or salmons or sole or solea or lamprey or lampreys or pumpkinseed or sunfish or sunfishes or tilapia or tilapias or turbot or turbots or flatfish or flatfishes or sciuridae or squirrel or squirrels or chipmunk or chipmunks or suslik or susliks or vole or voles or lemming or lemmings or muskrat or muskrats or lemmus or otter or otters or marten or martens or martes or weasel or badger or badgers or ermine or mink or minks or sable or sables or gulo or gulos or wolverine or wolverines or mustela or llama or llamas or alpaca or alpacas or camelid or camelids or guanaco or guanacos or chiroptera or chiropteras or bat or bats or fox or foxes or iguana or iguanas or xenopus laevis or parakeet or parakeets or parrot or parrots or donkey or donkeys or mule or mules or zebra or zebras or shrew or shrews or bison or bisons or buffalo or buffaloes or deer or deers or bear or bears or panda or pandas or wild hog or wild boar or fitchew or fitch or beaver or beavers or jerboa or jerboas or capybara or capybaras or canine or bovine or porcine or hog or hogs).ti,ab,kf. |         |
| 3  | 1 or 2                                                                                                                                                                                                                                                                                                                                                                                                                                                                                                                                                                                                                                                                                                                                                                                                                                                                                                                                                                                                                                                                                                                                                                                                                                                                                                                                                                                                                                                                                                                                                                                                                                                                                                                                                                                                                                                                                                                                                                                                                                                                                                                                                                                                                                                                                                                                                                                                                                                          | 8057458 |
| 4  | systematic review.pt.                                                                                                                                                                                                                                                                                                                                                                                                                                                                                                                                                                                                                                                                                                                                                                                                                                                                                                                                                                                                                                                                                                                                                                                                                                                                                                                                                                                                                                                                                                                                                                                                                                                                                                                                                                                                                                                                                                                                                                                                                                                                                                                                                                                                                                                                                                                                                                                                                                           | 198997  |
| 5  | meta analysis.pt.                                                                                                                                                                                                                                                                                                                                                                                                                                                                                                                                                                                                                                                                                                                                                                                                                                                                                                                                                                                                                                                                                                                                                                                                                                                                                                                                                                                                                                                                                                                                                                                                                                                                                                                                                                                                                                                                                                                                                                                                                                                                                                                                                                                                                                                                                                                                                                                                                                               | 162272  |
| 6  | ((systematic or scoping) and review).ti.                                                                                                                                                                                                                                                                                                                                                                                                                                                                                                                                                                                                                                                                                                                                                                                                                                                                                                                                                                                                                                                                                                                                                                                                                                                                                                                                                                                                                                                                                                                                                                                                                                                                                                                                                                                                                                                                                                                                                                                                                                                                                                                                                                                                                                                                                                                                                                                                                        | 202301  |
| 7  | (meta analy* or metaanaly*).ti.                                                                                                                                                                                                                                                                                                                                                                                                                                                                                                                                                                                                                                                                                                                                                                                                                                                                                                                                                                                                                                                                                                                                                                                                                                                                                                                                                                                                                                                                                                                                                                                                                                                                                                                                                                                                                                                                                                                                                                                                                                                                                                                                                                                                                                                                                                                                                                                                                                 | 156919  |
| 8  | or/4-7                                                                                                                                                                                                                                                                                                                                                                                                                                                                                                                                                                                                                                                                                                                                                                                                                                                                                                                                                                                                                                                                                                                                                                                                                                                                                                                                                                                                                                                                                                                                                                                                                                                                                                                                                                                                                                                                                                                                                                                                                                                                                                                                                                                                                                                                                                                                                                                                                                                          | 348602  |
| 9  | 3 and 8                                                                                                                                                                                                                                                                                                                                                                                                                                                                                                                                                                                                                                                                                                                                                                                                                                                                                                                                                                                                                                                                                                                                                                                                                                                                                                                                                                                                                                                                                                                                                                                                                                                                                                                                                                                                                                                                                                                                                                                                                                                                                                                                                                                                                                                                                                                                                                                                                                                         | 19078   |
| 10 | Translational Research, Biomedical/                                                                                                                                                                                                                                                                                                                                                                                                                                                                                                                                                                                                                                                                                                                                                                                                                                                                                                                                                                                                                                                                                                                                                                                                                                                                                                                                                                                                                                                                                                                                                                                                                                                                                                                                                                                                                                                                                                                                                                                                                                                                                                                                                                                                                                                                                                                                                                                                                             | 12661   |
| 11 | Translational Science, Biomedical/                                                                                                                                                                                                                                                                                                                                                                                                                                                                                                                                                                                                                                                                                                                                                                                                                                                                                                                                                                                                                                                                                                                                                                                                                                                                                                                                                                                                                                                                                                                                                                                                                                                                                                                                                                                                                                                                                                                                                                                                                                                                                                                                                                                                                                                                                                                                                                                                                              | 155     |
| 12 | (exploit* or translat*).ti,ab,kf.                                                                                                                                                                                                                                                                                                                                                                                                                                                                                                                                                                                                                                                                                                                                                                                                                                                                                                                                                                                                                                                                                                                                                                                                                                                                                                                                                                                                                                                                                                                                                                                                                                                                                                                                                                                                                                                                                                                                                                                                                                                                                                                                                                                                                                                                                                                                                                                                                               | 521595  |

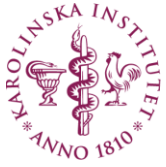

|    |                                                           |        |
|----|-----------------------------------------------------------|--------|
| 13 | ((preclinical* or pre-clinical*) and clinical*).ti,ab,kf. | 90733  |
| 14 | or/10-13                                                  | 603930 |
| 15 | 9 and 14                                                  | 1795   |



## 2. Embase

| <p>Interface: embase.com</p> <p>Date of Search: 17 June 2022</p> <p>Number of hits:</p> <ul style="list-style-type: none"> <li>- Broad: 18359</li> <li>- Narrow: 2077</li> </ul> <p>Comment: Emtree is the controlled vocabulary in Embase</p>                                                                                                                                                                                                                                                                                                                                                                                                                                                                                                                                                                                                                                                                                                                                                                                                                                                                                                                                                                                                                                                                                                                                                       | <p>Field labels</p> <ul style="list-style-type: none"> <li>• /exp = exploded Emtree term</li> <li>• /de = non exploded Emtree term</li> <li>• ti,ab,kw = title, abstract and author keywords</li> <li>• NEAR/x = within x words, regardless of order</li> <li>• * = truncation of word for alternate endings</li> </ul> |              |         |  |       |                           |         |                                 |         |                                                                                            |         |                                                      |        |                                                                           |        |                         |         |                                         |         |                                                     |         |                                                          |         |                                                          |  |
|------------------------------------------------------------------------------------------------------------------------------------------------------------------------------------------------------------------------------------------------------------------------------------------------------------------------------------------------------------------------------------------------------------------------------------------------------------------------------------------------------------------------------------------------------------------------------------------------------------------------------------------------------------------------------------------------------------------------------------------------------------------------------------------------------------------------------------------------------------------------------------------------------------------------------------------------------------------------------------------------------------------------------------------------------------------------------------------------------------------------------------------------------------------------------------------------------------------------------------------------------------------------------------------------------------------------------------------------------------------------------------------------------|-------------------------------------------------------------------------------------------------------------------------------------------------------------------------------------------------------------------------------------------------------------------------------------------------------------------------|--------------|---------|--|-------|---------------------------|---------|---------------------------------|---------|--------------------------------------------------------------------------------------------|---------|------------------------------------------------------|--------|---------------------------------------------------------------------------|--------|-------------------------|---------|-----------------------------------------|---------|-----------------------------------------------------|---------|----------------------------------------------------------|---------|----------------------------------------------------------|--|
| <table border="1"> <thead> <tr> <th style="text-align: left;">No.<br/>Query</th> <th style="text-align: right;">Results</th> </tr> </thead> <tbody> <tr> <td></td> <td style="text-align: right;">2,077</td> </tr> <tr> <td><b>#15</b><br/>#10 AND #14</td> <td style="text-align: right;">629,715</td> </tr> <tr> <td><b>#14</b><br/>#11 OR #12 OR #13</td> <td style="text-align: right;">139,900</td> </tr> <tr> <td><b>#13</b><br/>(preclinical*:ti,ab,kw OR 'pre clinical*':ti,ab,kw) AND clinical**::ti,ab,kw</td> <td style="text-align: right;">499,843</td> </tr> <tr> <td><b>#12</b><br/>exploit:ti,ab,kw OR translat*:ti,ab,kw</td> <td style="text-align: right;">20,612</td> </tr> <tr> <td><b>#11</b><br/>'translational research'/exp OR 'translational science'/exp</td> <td style="text-align: right;">18,359</td> </tr> <tr> <td><b>#10</b><br/>#3 AND #9</td> <td style="text-align: right;">526,317</td> </tr> <tr> <td><b>#9</b><br/>#4 OR #5 OR #6 OR #7 OR #8</td> <td style="text-align: right;">192,784</td> </tr> <tr> <td><b>#8</b><br/>meta:ti AND analy*:ti OR metaanaly*:ti</td> <td style="text-align: right;">235,164</td> </tr> <tr> <td><b>#7</b><br/>(systematic:ti OR scoping:ti) AND review:ti</td> <td style="text-align: right;">235,164</td> </tr> <tr> <td><b>#6</b><br/>(systematic:ti OR scoping:ti) AND review:ti</td> <td></td> </tr> </tbody> </table> |                                                                                                                                                                                                                                                                                                                         | No.<br>Query | Results |  | 2,077 | <b>#15</b><br>#10 AND #14 | 629,715 | <b>#14</b><br>#11 OR #12 OR #13 | 139,900 | <b>#13</b><br>(preclinical*:ti,ab,kw OR 'pre clinical*':ti,ab,kw) AND clinical**::ti,ab,kw | 499,843 | <b>#12</b><br>exploit:ti,ab,kw OR translat*:ti,ab,kw | 20,612 | <b>#11</b><br>'translational research'/exp OR 'translational science'/exp | 18,359 | <b>#10</b><br>#3 AND #9 | 526,317 | <b>#9</b><br>#4 OR #5 OR #6 OR #7 OR #8 | 192,784 | <b>#8</b><br>meta:ti AND analy*:ti OR metaanaly*:ti | 235,164 | <b>#7</b><br>(systematic:ti OR scoping:ti) AND review:ti | 235,164 | <b>#6</b><br>(systematic:ti OR scoping:ti) AND review:ti |  |
| No.<br>Query                                                                                                                                                                                                                                                                                                                                                                                                                                                                                                                                                                                                                                                                                                                                                                                                                                                                                                                                                                                                                                                                                                                                                                                                                                                                                                                                                                                         | Results                                                                                                                                                                                                                                                                                                                 |              |         |  |       |                           |         |                                 |         |                                                                                            |         |                                                      |        |                                                                           |        |                         |         |                                         |         |                                                     |         |                                                          |         |                                                          |  |
|                                                                                                                                                                                                                                                                                                                                                                                                                                                                                                                                                                                                                                                                                                                                                                                                                                                                                                                                                                                                                                                                                                                                                                                                                                                                                                                                                                                                      | 2,077                                                                                                                                                                                                                                                                                                                   |              |         |  |       |                           |         |                                 |         |                                                                                            |         |                                                      |        |                                                                           |        |                         |         |                                         |         |                                                     |         |                                                          |         |                                                          |  |
| <b>#15</b><br>#10 AND #14                                                                                                                                                                                                                                                                                                                                                                                                                                                                                                                                                                                                                                                                                                                                                                                                                                                                                                                                                                                                                                                                                                                                                                                                                                                                                                                                                                            | 629,715                                                                                                                                                                                                                                                                                                                 |              |         |  |       |                           |         |                                 |         |                                                                                            |         |                                                      |        |                                                                           |        |                         |         |                                         |         |                                                     |         |                                                          |         |                                                          |  |
| <b>#14</b><br>#11 OR #12 OR #13                                                                                                                                                                                                                                                                                                                                                                                                                                                                                                                                                                                                                                                                                                                                                                                                                                                                                                                                                                                                                                                                                                                                                                                                                                                                                                                                                                      | 139,900                                                                                                                                                                                                                                                                                                                 |              |         |  |       |                           |         |                                 |         |                                                                                            |         |                                                      |        |                                                                           |        |                         |         |                                         |         |                                                     |         |                                                          |         |                                                          |  |
| <b>#13</b><br>(preclinical*:ti,ab,kw OR 'pre clinical*':ti,ab,kw) AND clinical**::ti,ab,kw                                                                                                                                                                                                                                                                                                                                                                                                                                                                                                                                                                                                                                                                                                                                                                                                                                                                                                                                                                                                                                                                                                                                                                                                                                                                                                           | 499,843                                                                                                                                                                                                                                                                                                                 |              |         |  |       |                           |         |                                 |         |                                                                                            |         |                                                      |        |                                                                           |        |                         |         |                                         |         |                                                     |         |                                                          |         |                                                          |  |
| <b>#12</b><br>exploit:ti,ab,kw OR translat*:ti,ab,kw                                                                                                                                                                                                                                                                                                                                                                                                                                                                                                                                                                                                                                                                                                                                                                                                                                                                                                                                                                                                                                                                                                                                                                                                                                                                                                                                                 | 20,612                                                                                                                                                                                                                                                                                                                  |              |         |  |       |                           |         |                                 |         |                                                                                            |         |                                                      |        |                                                                           |        |                         |         |                                         |         |                                                     |         |                                                          |         |                                                          |  |
| <b>#11</b><br>'translational research'/exp OR 'translational science'/exp                                                                                                                                                                                                                                                                                                                                                                                                                                                                                                                                                                                                                                                                                                                                                                                                                                                                                                                                                                                                                                                                                                                                                                                                                                                                                                                            | 18,359                                                                                                                                                                                                                                                                                                                  |              |         |  |       |                           |         |                                 |         |                                                                                            |         |                                                      |        |                                                                           |        |                         |         |                                         |         |                                                     |         |                                                          |         |                                                          |  |
| <b>#10</b><br>#3 AND #9                                                                                                                                                                                                                                                                                                                                                                                                                                                                                                                                                                                                                                                                                                                                                                                                                                                                                                                                                                                                                                                                                                                                                                                                                                                                                                                                                                              | 526,317                                                                                                                                                                                                                                                                                                                 |              |         |  |       |                           |         |                                 |         |                                                                                            |         |                                                      |        |                                                                           |        |                         |         |                                         |         |                                                     |         |                                                          |         |                                                          |  |
| <b>#9</b><br>#4 OR #5 OR #6 OR #7 OR #8                                                                                                                                                                                                                                                                                                                                                                                                                                                                                                                                                                                                                                                                                                                                                                                                                                                                                                                                                                                                                                                                                                                                                                                                                                                                                                                                                              | 192,784                                                                                                                                                                                                                                                                                                                 |              |         |  |       |                           |         |                                 |         |                                                                                            |         |                                                      |        |                                                                           |        |                         |         |                                         |         |                                                     |         |                                                          |         |                                                          |  |
| <b>#8</b><br>meta:ti AND analy*:ti OR metaanaly*:ti                                                                                                                                                                                                                                                                                                                                                                                                                                                                                                                                                                                                                                                                                                                                                                                                                                                                                                                                                                                                                                                                                                                                                                                                                                                                                                                                                  | 235,164                                                                                                                                                                                                                                                                                                                 |              |         |  |       |                           |         |                                 |         |                                                                                            |         |                                                      |        |                                                                           |        |                         |         |                                         |         |                                                     |         |                                                          |         |                                                          |  |
| <b>#7</b><br>(systematic:ti OR scoping:ti) AND review:ti                                                                                                                                                                                                                                                                                                                                                                                                                                                                                                                                                                                                                                                                                                                                                                                                                                                                                                                                                                                                                                                                                                                                                                                                                                                                                                                                             | 235,164                                                                                                                                                                                                                                                                                                                 |              |         |  |       |                           |         |                                 |         |                                                                                            |         |                                                      |        |                                                                           |        |                         |         |                                         |         |                                                     |         |                                                          |         |                                                          |  |
| <b>#6</b><br>(systematic:ti OR scoping:ti) AND review:ti                                                                                                                                                                                                                                                                                                                                                                                                                                                                                                                                                                                                                                                                                                                                                                                                                                                                                                                                                                                                                                                                                                                                                                                                                                                                                                                                             |                                                                                                                                                                                                                                                                                                                         |              |         |  |       |                           |         |                                 |         |                                                                                            |         |                                                      |        |                                                                           |        |                         |         |                                         |         |                                                     |         |                                                          |         |                                                          |  |

|                                                                                                                                                                                                                                                                                                                                                                                                                                                                                                                                                                                                                                                                                                                                                                                                                                                                                                                                                                                                                                                                                                                                                                                                                                                                                                                                                                                                                                                                                                                                                                                                                                                                                                                                                                                                                                                                                                                                                                                                                                                                                                                                                                                                                                                                                                                                                                                                                                                                                                                                                                                                                  |           |
|------------------------------------------------------------------------------------------------------------------------------------------------------------------------------------------------------------------------------------------------------------------------------------------------------------------------------------------------------------------------------------------------------------------------------------------------------------------------------------------------------------------------------------------------------------------------------------------------------------------------------------------------------------------------------------------------------------------------------------------------------------------------------------------------------------------------------------------------------------------------------------------------------------------------------------------------------------------------------------------------------------------------------------------------------------------------------------------------------------------------------------------------------------------------------------------------------------------------------------------------------------------------------------------------------------------------------------------------------------------------------------------------------------------------------------------------------------------------------------------------------------------------------------------------------------------------------------------------------------------------------------------------------------------------------------------------------------------------------------------------------------------------------------------------------------------------------------------------------------------------------------------------------------------------------------------------------------------------------------------------------------------------------------------------------------------------------------------------------------------------------------------------------------------------------------------------------------------------------------------------------------------------------------------------------------------------------------------------------------------------------------------------------------------------------------------------------------------------------------------------------------------------------------------------------------------------------------------------------------------|-----------|
|                                                                                                                                                                                                                                                                                                                                                                                                                                                                                                                                                                                                                                                                                                                                                                                                                                                                                                                                                                                                                                                                                                                                                                                                                                                                                                                                                                                                                                                                                                                                                                                                                                                                                                                                                                                                                                                                                                                                                                                                                                                                                                                                                                                                                                                                                                                                                                                                                                                                                                                                                                                                                  | 246,160   |
| <b>#5</b><br>'meta analysis'/de                                                                                                                                                                                                                                                                                                                                                                                                                                                                                                                                                                                                                                                                                                                                                                                                                                                                                                                                                                                                                                                                                                                                                                                                                                                                                                                                                                                                                                                                                                                                                                                                                                                                                                                                                                                                                                                                                                                                                                                                                                                                                                                                                                                                                                                                                                                                                                                                                                                                                                                                                                                  |           |
|                                                                                                                                                                                                                                                                                                                                                                                                                                                                                                                                                                                                                                                                                                                                                                                                                                                                                                                                                                                                                                                                                                                                                                                                                                                                                                                                                                                                                                                                                                                                                                                                                                                                                                                                                                                                                                                                                                                                                                                                                                                                                                                                                                                                                                                                                                                                                                                                                                                                                                                                                                                                                  | 347,491   |
| <b>#4</b><br>'systematic review'/de                                                                                                                                                                                                                                                                                                                                                                                                                                                                                                                                                                                                                                                                                                                                                                                                                                                                                                                                                                                                                                                                                                                                                                                                                                                                                                                                                                                                                                                                                                                                                                                                                                                                                                                                                                                                                                                                                                                                                                                                                                                                                                                                                                                                                                                                                                                                                                                                                                                                                                                                                                              |           |
|                                                                                                                                                                                                                                                                                                                                                                                                                                                                                                                                                                                                                                                                                                                                                                                                                                                                                                                                                                                                                                                                                                                                                                                                                                                                                                                                                                                                                                                                                                                                                                                                                                                                                                                                                                                                                                                                                                                                                                                                                                                                                                                                                                                                                                                                                                                                                                                                                                                                                                                                                                                                                  | 7,926,770 |
| <b>#3</b><br>#1 OR #2                                                                                                                                                                                                                                                                                                                                                                                                                                                                                                                                                                                                                                                                                                                                                                                                                                                                                                                                                                                                                                                                                                                                                                                                                                                                                                                                                                                                                                                                                                                                                                                                                                                                                                                                                                                                                                                                                                                                                                                                                                                                                                                                                                                                                                                                                                                                                                                                                                                                                                                                                                                            |           |
|                                                                                                                                                                                                                                                                                                                                                                                                                                                                                                                                                                                                                                                                                                                                                                                                                                                                                                                                                                                                                                                                                                                                                                                                                                                                                                                                                                                                                                                                                                                                                                                                                                                                                                                                                                                                                                                                                                                                                                                                                                                                                                                                                                                                                                                                                                                                                                                                                                                                                                                                                                                                                  | 7,603,997 |
| <b>#2</b><br>'animal experiment'/exp OR 'animal model'/exp OR 'invertebrate'/exp OR 'animal'/de OR 'experimental animal'/exp OR 'transgenic animal'/exp OR 'male animal'/exp OR 'female animal'/exp OR 'juvenile animal'/exp OR 'chordata'/de OR 'vertebrate'/de OR 'tetrapod'/de OR 'fish'/exp OR 'amniote'/de OR 'amphibia'/exp OR 'mammal'/de OR 'reptile'/exp OR 'sauropsid'/exp OR 'therian'/de OR 'monotremate'/exp OR 'placental mammals'/de OR 'marsupial'/exp OR 'euarchontoglires'/de OR 'afrotheria'/exp OR 'boreoeutheria'/exp OR 'laurasiatheria'/exp OR 'xenarthra'/exp OR 'primate'/de OR 'dermoptera'/exp OR 'glires'/exp OR 'scandentia'/exp OR 'haplorhini'/de OR 'prosimian'/exp OR 'simian'/de OR 'tarsiiform'/exp OR 'catarrhini'/de OR 'platyrrhini'/exp OR 'ape'/de OR 'cercopithecidae'/exp OR 'hominid'/de OR 'hylobatidae'/exp OR 'chimpanzee'/exp OR 'gorilla'/exp OR 'orangutan'/exp                                                                                                                                                                                                                                                                                                                                                                                                                                                                                                                                                                                                                                                                                                                                                                                                                                                                                                                                                                                                                                                                                                                                                                                                                                                                                                                                                                                                                                                                                                                                                                                                                                                                                                 |           |
|                                                                                                                                                                                                                                                                                                                                                                                                                                                                                                                                                                                                                                                                                                                                                                                                                                                                                                                                                                                                                                                                                                                                                                                                                                                                                                                                                                                                                                                                                                                                                                                                                                                                                                                                                                                                                                                                                                                                                                                                                                                                                                                                                                                                                                                                                                                                                                                                                                                                                                                                                                                                                  | 1,026,894 |
| <b>#1</b><br>(animals:ti,ab,kw OR animal:ti,ab,kw OR mice:ti,ab,kw OR mus:ti,ab,kw OR mouse:ti,ab,kw OR murine:ti,ab,kw OR woodmouse:ti,ab,kw OR rats:ti,ab,kw OR rat:ti,ab,kw OR murinae:ti,ab,kw OR muridae:ti,ab,kw OR cottonrat:ti,ab,kw OR cottonrats:ti,ab,kw OR hamster:ti,ab,kw OR hamsters:ti,ab,kw OR cricetinae:ti,ab,kw OR rodentia:ti,ab,kw OR rodent:ti,ab,kw OR rodents:ti,ab,kw OR pigs:ti,ab,kw OR pig:ti,ab,kw OR swine:ti,ab,kw OR swines:ti,ab,kw OR piglets:ti,ab,kw OR piglet:ti,ab,kw OR boar:ti,ab,kw OR boars:ti,ab,kw OR 'sus scrofa':ti,ab,kw OR ferrets:ti,ab,kw OR ferret:ti,ab,kw OR polecat:ti,ab,kw OR polecats:ti,ab,kw OR 'mustela putorius':ti,ab,kw OR 'guinea pigs':ti,ab,kw OR 'guinea pig':ti,ab,kw OR cavia:ti,ab,kw OR callithrix:ti,ab,kw OR marmoset:ti,ab,kw OR marmosets:ti,ab,kw OR cebuella:ti,ab,kw OR hapale:ti,ab,kw OR octodon:ti,ab,kw OR chinchilla:ti,ab,kw OR chinchillas:ti,ab,kw OR gerbillinae:ti,ab,kw OR gerbil:ti,ab,kw OR gerbils:ti,ab,kw OR jird:ti,ab,kw OR jirds:ti,ab,kw OR merione:ti,ab,kw OR meriones:ti,ab,kw OR rabbits:ti,ab,kw OR rabbit:ti,ab,kw OR hares:ti,ab,kw OR hare:ti,ab,kw OR diptera:ti,ab,kw OR flies:ti,ab,kw OR fly:ti,ab,kw OR dipteral:ti,ab,kw OR drosophila:ti,ab,kw OR drosophilidae:ti,ab,kw OR cats:ti,ab,kw OR cat:ti,ab,kw OR carus:ti,ab,kw OR felis:ti,ab,kw OR nematoda:ti,ab,kw OR nematode:ti,ab,kw OR nematodes:ti,ab,kw OR sipunculida:ti,ab,kw OR dogs:ti,ab,kw OR dog:ti,ab,kw OR canine:ti,ab,kw OR canines:ti,ab,kw OR canis:ti,ab,kw OR sheep:ti,ab,kw OR sheeps:ti,ab,kw OR mouflon:ti,ab,kw OR mouflons:ti,ab,kw OR ovis:ti,ab,kw OR goats:ti,ab,kw OR goat:ti,ab,kw OR capra:ti,ab,kw OR capras:ti,ab,kw OR rupicapra:ti,ab,kw OR rupicapras:ti,ab,kw OR chamois:ti,ab,kw OR haplorhini:ti,ab,kw OR monkey:ti,ab,kw OR monkeys:ti,ab,kw OR anthropoidea:ti,ab,kw OR anthropoids:ti,ab,kw OR saguinus:ti,ab,kw OR tamarin:ti,ab,kw OR tamarins:ti,ab,kw OR leontopithecus:ti,ab,kw OR hominidae:ti,ab,kw OR ape:ti,ab,kw OR apes:ti,ab,kw OR panpaniscus:ti,ab,kw OR bonobo:ti,ab,kw OR bonobos:ti,ab,kw OR 'pan troglodytes':ti,ab,kw OR gibbon:ti,ab,kw OR gibbons:ti,ab,kw OR siamang:ti,ab,kw OR siamangs:ti,ab,kw OR nomascus:ti,ab,kw OR symphalangus:ti,ab,kw OR chimpanzee:ti,ab,kw OR chimpanzees:ti,ab,kw OR prosimian:ti,ab,kw OR prosimians:ti,ab,kw OR 'bush baby':ti,ab,kw OR 'bush babies':ti,ab,kw OR galagos:ti,ab,kw OR galago:ti,ab,kw OR pongidae:ti,ab,kw OR gorilla:ti,ab,kw OR gorillas:ti,ab,kw OR 'pongo pygmaeus':ti,ab,kw OR orangutan:ti,ab,kw OR orangutans:ti,ab,kw |           |



OR **lemur**:ti,ab,kw OR **lemurs**:ti,ab,kw OR **lemuridae**:ti,ab,kw OR **horse**:ti,ab,kw OR **horses**:ti,ab,kw OR **equus**:ti,ab,kw  
OR **cow**:ti,ab,kw OR **calf**:ti,ab,kw OR **bull**:ti,ab,kw OR **chicken**:ti,ab,kw OR **chickens**:ti,ab,kw OR **gallus**:ti,ab,kw  
OR **quail**:ti,ab,kw OR **bird**:ti,ab,kw OR **birds**:ti,ab,kw OR **quails**:ti,ab,kw OR **poultry**:ti,ab,kw OR **poultres**:ti,ab,kw  
OR **fowl**:ti,ab,kw OR **fowls**:ti,ab,kw OR **reptile**:ti,ab,kw OR **reptilia**:ti,ab,kw OR **reptiles**:ti,ab,kw OR **snakes**:ti,ab,kw  
OR **snake**:ti,ab,kw OR **lizard**:ti,ab,kw OR **lizards**:ti,ab,kw OR **alligator**:ti,ab,kw OR **alligators**:ti,ab,kw  
OR **crocodile**:ti,ab,kw OR **crocodiles**:ti,ab,kw OR **turtle**:ti,ab,kw OR **turtles**:ti,ab,kw OR **amphibian**:ti,ab,kw  
OR **amphibians**:ti,ab,kw OR **amphibia**:ti,ab,kw OR **frog**:ti,ab,kw OR **frogs**:ti,ab,kw OR **bombina**:ti,ab,kw  
OR **salientia**:ti,ab,kw OR **toad**:ti,ab,kw OR **toads**:ti,ab,kw OR **epidalea**:ti,ab,kw) AND **calamita**:ti,ab,kw  
OR **salamander**:ti,ab,kw OR **salamanders**:ti,ab,kw OR **fish**:ti,ab,kw OR **fishes**:ti,ab,kw OR **pisces**:ti,ab,kw  
OR **catfish**:ti,ab,kw OR **catfishes**:ti,ab,kw OR **siluriformes**:ti,ab,kw OR **arius**:ti,ab,kw OR **heteropneustes**:ti,ab,kw  
OR **sheatfish**:ti,ab,kw OR **perch**:ti,ab,kw OR **perches**:ti,ab,kw OR **percidae**:ti,ab,kw OR **perca**:ti,ab,kw OR **trout**:ti,ab,kw  
OR **trouts**:ti,ab,kw OR **char**:ti,ab,kw OR **chars**:ti,ab,kw OR **salvelinus**:ti,ab,kw OR **minnow**:ti,ab,kw  
OR **cyprinidae**:ti,ab,kw OR **carps**:ti,ab,kw OR **carp**:ti,ab,kw OR **zebrafish**:ti,ab,kw OR **zebrafishes**:ti,ab,kw  
OR **goldfish**:ti,ab,kw OR **goldfishes**:ti,ab,kw OR **guppy**:ti,ab,kw OR **guppies**:ti,ab,kw OR **chub**:ti,ab,kw OR **chubs**:ti,ab,kw  
OR **tinca**:ti,ab,kw OR **barbels**:ti,ab,kw OR **barbus**:ti,ab,kw OR **pimephales**:ti,ab,kw OR **promelas**:ti,ab,kw OR **'poecilia  
reticulata'**:ti,ab,kw OR **mullet**:ti,ab,kw OR **mullets**:ti,ab,kw OR **eel**:ti,ab,kw OR **eels**:ti,ab,kw OR **seahorse**:ti,ab,kw  
OR **seahorses**:ti,ab,kw OR **'mugil curema'**:ti,ab,kw OR **'atlantic cod'**:ti,ab,kw OR **shark**:ti,ab,kw OR **sharks**:ti,ab,kw  
OR **catshark**:ti,ab,kw OR **anguilla**:ti,ab,kw OR **salmonid**:ti,ab,kw OR **salmonids**:ti,ab,kw OR **whitefish**:ti,ab,kw  
OR **whitefishes**:ti,ab,kw OR **salmon**:ti,ab,kw OR **salmons**:ti,ab,kw OR **sole**:ti,ab,kw OR **solea**:ti,ab,kw  
OR **lamprey**:ti,ab,kw OR **lampreys**:ti,ab,kw OR **pumpkinseed**:ti,ab,kw OR **sunfish**:ti,ab,kw OR **sunfishes**:ti,ab,kw  
OR **tilapia**:ti,ab,kw OR **tilapias**:ti,ab,kw OR **turbot**:ti,ab,kw OR **turbots**:ti,ab,kw OR **flatfish**:ti,ab,kw  
OR **flatfishes**:ti,ab,kw OR **sciuridae**:ti,ab,kw OR **squirrel**:ti,ab,kw OR **squirrels**:ti,ab,kw OR **chipmunk**:ti,ab,kw  
OR **chipmunks**:ti,ab,kw OR **suslik**:ti,ab,kw OR **susliks**:ti,ab,kw OR **vole**:ti,ab,kw OR **voles**:ti,ab,kw OR **lemming**:ti,ab,kw  
OR **lemmings**:ti,ab,kw OR **muskrat**:ti,ab,kw OR **muskrats**:ti,ab,kw OR **lemmus**:ti,ab,kw OR **otter**:ti,ab,kw  
OR **otters**:ti,ab,kw OR **marten**:ti,ab,kw OR **martens**:ti,ab,kw OR **martes**:ti,ab,kw OR **weasel**:ti,ab,kw OR **badger**:ti,ab,kw  
OR **badgers**:ti,ab,kw OR **ermine**:ti,ab,kw OR **mink**:ti,ab,kw OR **minks**:ti,ab,kw OR **sable**:ti,ab,kw OR **sables**:ti,ab,kw  
OR **gulo**:ti,ab,kw OR **gulos**:ti,ab,kw OR **wolverine**:ti,ab,kw OR **wolverines**:ti,ab,kw OR **mustela**:ti,ab,kw  
OR **llama**:ti,ab,kw OR **llamas**:ti,ab,kw OR **alpaca**:ti,ab,kw OR **alpacas**:ti,ab,kw OR **camelid**:ti,ab,kw OR **camelids**:ti,ab,kw  
OR **guanaco**:ti,ab,kw OR **guanacos**:ti,ab,kw OR **chiroptera**:ti,ab,kw OR **chiropteras**:ti,ab,kw OR **bat**:ti,ab,kw  
OR **bats**:ti,ab,kw OR **fox**:ti,ab,kw OR **foxes**:ti,ab,kw OR **iguana**:ti,ab,kw OR **iguanas**:ti,ab,kw OR **'xenopus laevis'**:ti,ab,kw  
OR **parakeet**:ti,ab,kw OR **parakeets**:ti,ab,kw OR **parrot**:ti,ab,kw OR **parrots**:ti,ab,kw OR **donkey**:ti,ab,kw  
OR **donkeys**:ti,ab,kw OR **mule**:ti,ab,kw OR **mules**:ti,ab,kw OR **zebra**:ti,ab,kw OR **zebras**:ti,ab,kw OR **shrew**:ti,ab,kw  
OR **shrews**:ti,ab,kw OR **bison**:ti,ab,kw OR **bisons**:ti,ab,kw OR **buffalo**:ti,ab,kw OR **buffaloes**:ti,ab,kw OR **deer**:ti,ab,kw  
OR **deers**:ti,ab,kw OR **bear**:ti,ab,kw OR **bears**:ti,ab,kw OR **panda**:ti,ab,kw OR **pandas**:ti,ab,kw OR **'wild hog'**:ti,ab,kw  
OR **'wild boar'**:ti,ab,kw OR **fitchew**:ti,ab,kw OR **fitch**:ti,ab,kw OR **beaver**:ti,ab,kw OR **beavers**:ti,ab,kw  
OR **jerboa**:ti,ab,kw OR **jerboas**:ti,ab,kw OR **capybara**:ti,ab,kw OR **capybaras**:ti,ab,kw OR **canine**:ti,ab,kw  
OR **bovine**:ti,ab,kw OR **porcine**:ti,ab,kw OR **hog**:ti,ab,kw OR **hogs**:ti,ab,kw

**w**



### 3. Web of Science Core Collection

|                                                                                                                                                                                                                                                                                                                                                                                                                 |                                                                                                                                                                                                                                                                                                                               |
|-----------------------------------------------------------------------------------------------------------------------------------------------------------------------------------------------------------------------------------------------------------------------------------------------------------------------------------------------------------------------------------------------------------------|-------------------------------------------------------------------------------------------------------------------------------------------------------------------------------------------------------------------------------------------------------------------------------------------------------------------------------|
| <p>Interface: Clarivate Analytics</p> <p>Editions = A&amp;HCI , ESCI , SCI-EXPANDED , SSCI</p> <p>Date of Search: 17 June 2022</p> <p>Number of hits:</p> <ul style="list-style-type: none"><li>- Broad: 14104</li><li>- Narrow: 1243</li></ul>                                                                                                                                                                 | <p>Field labels</p> <ul style="list-style-type: none"><li>• TS/Topic = title, abstract, author keywords and Keywords Plus</li><li>• NEAR/x = within x words, regardless of order</li><li>• * = truncation of word for alternate endings</li></ul> <p>Note: the <i>Exact search</i>-function was used for all the searches</p> |
| <p>9<br/>#8 AND #5<br/>1,243</p> <p>8<br/>#7 OR #6<br/>1,079,345</p> <p>7<br/>TS=((preclinical* or "pre-clinical*") and clinical*)<br/>88,112</p> <p>6<br/>TS=(exploit* or translat*)<br/>1,002,840</p> <p>5<br/>#4 AND #1<br/>14,104</p> <p>4<br/>#3 OR #2<br/>335,765</p> <p>3<br/>TI=("meta analy*" or metaanaly*)<br/>190,277</p> <p>2<br/>TI=((systematic or scoping) and review)<br/>232,253</p> <p>1</p> |                                                                                                                                                                                                                                                                                                                               |



TS=("animals" or "animal" or "mice" or "mus" or "mouse" or "murine" or "woodmouse" or "rats" or "rat" or "murinae" or "muridae" or "cottonrat" or "cottonrats" or "hamster" or "hamsters" or "cricetinae" or "rodentia" or "rodent" or "rodents" or "pigs" or "pig" or "swine" or "swines" or "piglets" or "piglet" or "boar" or "boars" or "sus scrofa" or "ferrets" or "ferret" or "polecat" or "polecats" or "mustela putorius" or "guinea pigs" or "guinea pig" or "cavia" or "callithrix" or "marmoset" or "marmosets" or "cebuella" or "hapale" or "octodon" or "chinchilla" or "chinchillas" or "gerbillinae" or "gerbil" or "gerbils" or "jird" or "jirds" or "merione" or "meriones" or "rabbits" or "rabbit" or "hares" or "hare" or "diptera" or "flies" or "fly" or "dipteral" or "drosophila" or "drosophilidae" or "cats" or "cat" or "carus" or "felis" or "nematoda" or "nematode" or "nematodes" or "sipunculida" or "dogs" or "dog" or "canine" or "canines" or "canis" or "sheep" or "sheeps" or "mouflon" or "mouflons" or "ovis" or "goats" or "goat" or "capra" or "capras" or "rupicapra" or "rupicapras" or "chamois" or "haplorhini" or "monkey" or "monkeys" or "anthropoidea" or "anthropoids" or "saguinus" or "tamarin" or "tamarins" or "leontopithecus" or "hominidae" or "ape" or "apes" or "panpaniscus" or "bonobo" or "bonobos" or "pan troglodytes" or "gibbon" or "gibbons" or "siamang" or "siamangs" or "nomascus" or "symphalangus" or "chimpanzee" or "chimpanzees" or "prosimian" or "prosimians" or "bush baby" or "bush babies" or "galagos" or "galago" or "pongidae" or "gorilla" or "gorillas" or "pongo pygmaeus" or "orangutan" or "orangutans" or "lemur" or "lemurs" or "lemuridae" or "horse" or "horses" or "equus" or "cow" or "calf" or "bull" or "chicken" or "chickens" or "gallus" or "quail" or "bird" or "birds" or "quails" or "poultry" or "poultryies" or "fowl" or "fowls" or "reptile" or "reptilia" or "reptiles" or "snakes" or "snake" or "lizard" or "lizards" or "alligator" or "alligators" or "crocodile" or "crocodiles" or "turtle" or "turtles" or "amphibian" or "amphibians" or "amphibia" or "frog" or "frogs" or "bombina" or "salientia" or "toad" or "toads" or "epidalea calamita" or "salamander" or "salamanders" or "eel" or "eels" or "fish" or "fishes" or "pisces" or "catfish" or "catfishes" or "siluriformes" or "arius" or "heteropneustes" or "sheatfish" or "perch" or "perches" or "percidae" or "perca" or "trout" or "trouts" or "char" or "chars" or "salvelinus" or "minnow" or "cyprinidae" or "carps" or "carp" or "zebrafish" or "zebrafishes" or "goldfish" or "goldfishes" or "guppy" or "guppies" or "chub" or "chubs" or "tinca" or "barbels" or "barbus" or "pimephales" or "promelas" or "poecilia reticulata" or "mullet" or "mulletts" or "eel" or "eels" or "seahorse" or "seahorses" or "mugil curema" or "atlantic cod" or "shark" or "sharks" or "catshark" or "anguilla" or "salmonid" or "salmonids" or "whitefish" or "whitefishes" or "salmon" or "salmons" or "sole" or "solea" or "lamprey" or "lampreys" or "pumpkinseed" or "sunfish" or "sunfishes" or "tilapia" or "tilapias" or "turbot" or "turbotts" or "flatfish" or "flatfishes" or "sciuridae" or "squirrel" or "squirrels" or "chipmunk" or "chipmunks" or "suslik" or "susliks" or "vole" or "voles" or "lemming" or "lemmings" or "muskrat" or "muskrats" or "lemmus" or "otter" or "otters" or "marten" or "martens" or "martes" or "weasel" or "badger" or "badgers" or "ermine" or "mink" or "minks" or "sable" or "sables" or "gulo" or "gulos" or "wolverine" or "wolverines" or "mustela" or "llama" or "llamas" or "alpaca" or "alpacas" or "camelid" or "camelids" or "guanaco" or "guanacos" or "chiroptera" or "chiropteras" or "bat" or "bats" or "fox" or "foxes" or "iguana" or "iguanas" or "xenopus laevis" or "parakeet" or "parakeets" or "parrot" or "parrots" or "donkey" or "donkeys" or "mule" or "mules" or "zebra" or "zebras" or "shrew" or "shrews" or "bison" or "bisons" or "buffalo" or "buffaloes" or "deer" or "deers" or "bear" or "bears" or "panda" or "pandas" or "wild hog" or "wild boar" or "fitchew" or "fitch" or "beaver" or "beavers" or "jerboa" or "jerboas" or "capybara" or "capybaras" or "canine" or "bovine" or "porcine" or "hog" or "hogs")



**Karolinska  
Institutet**

7,444,252
